# Supplementary material
Source: PubMed Central journal article supplement (PMC2681437)

# Supplemental Figure 1

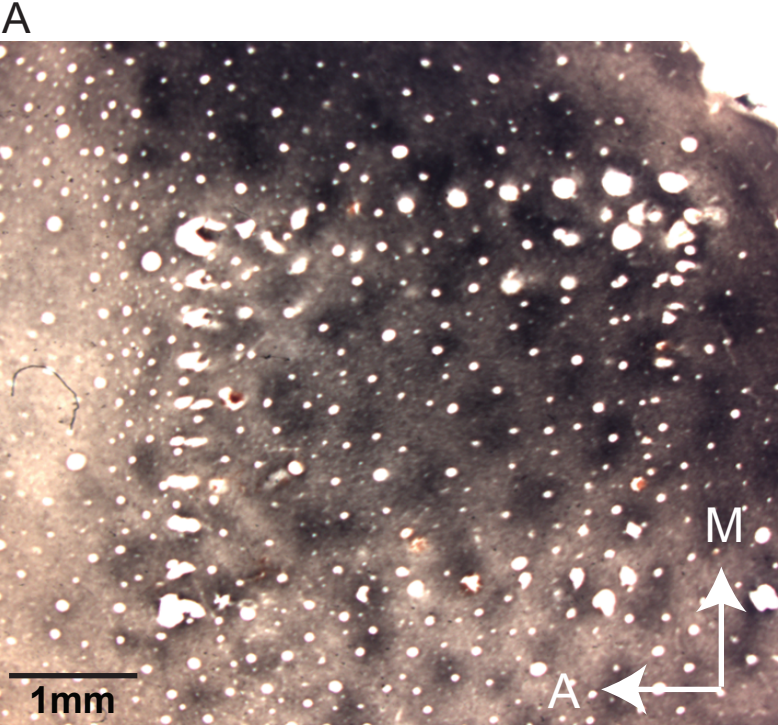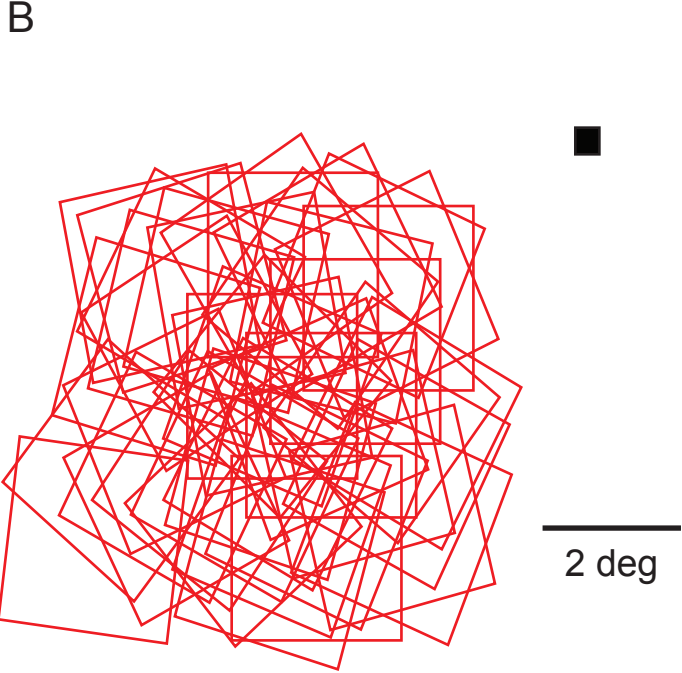

# Supplemental figure 2

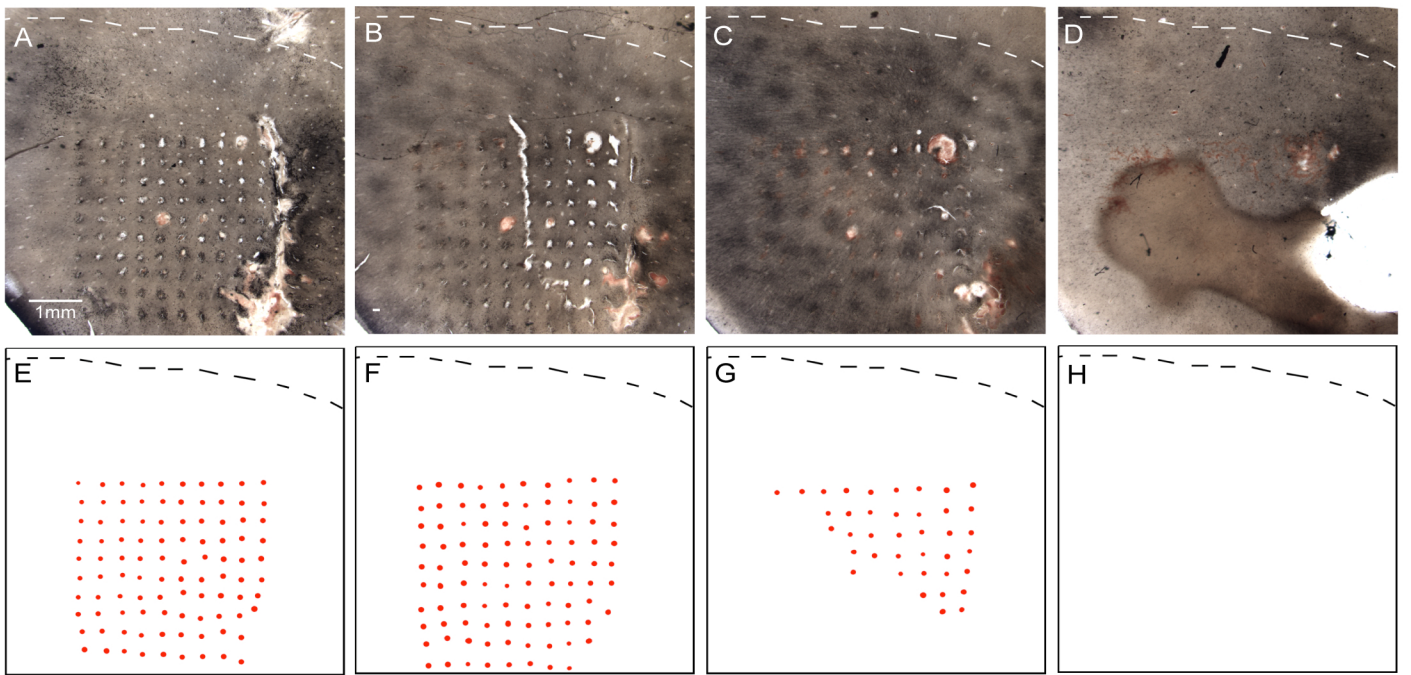

# Supplemental Figure 3

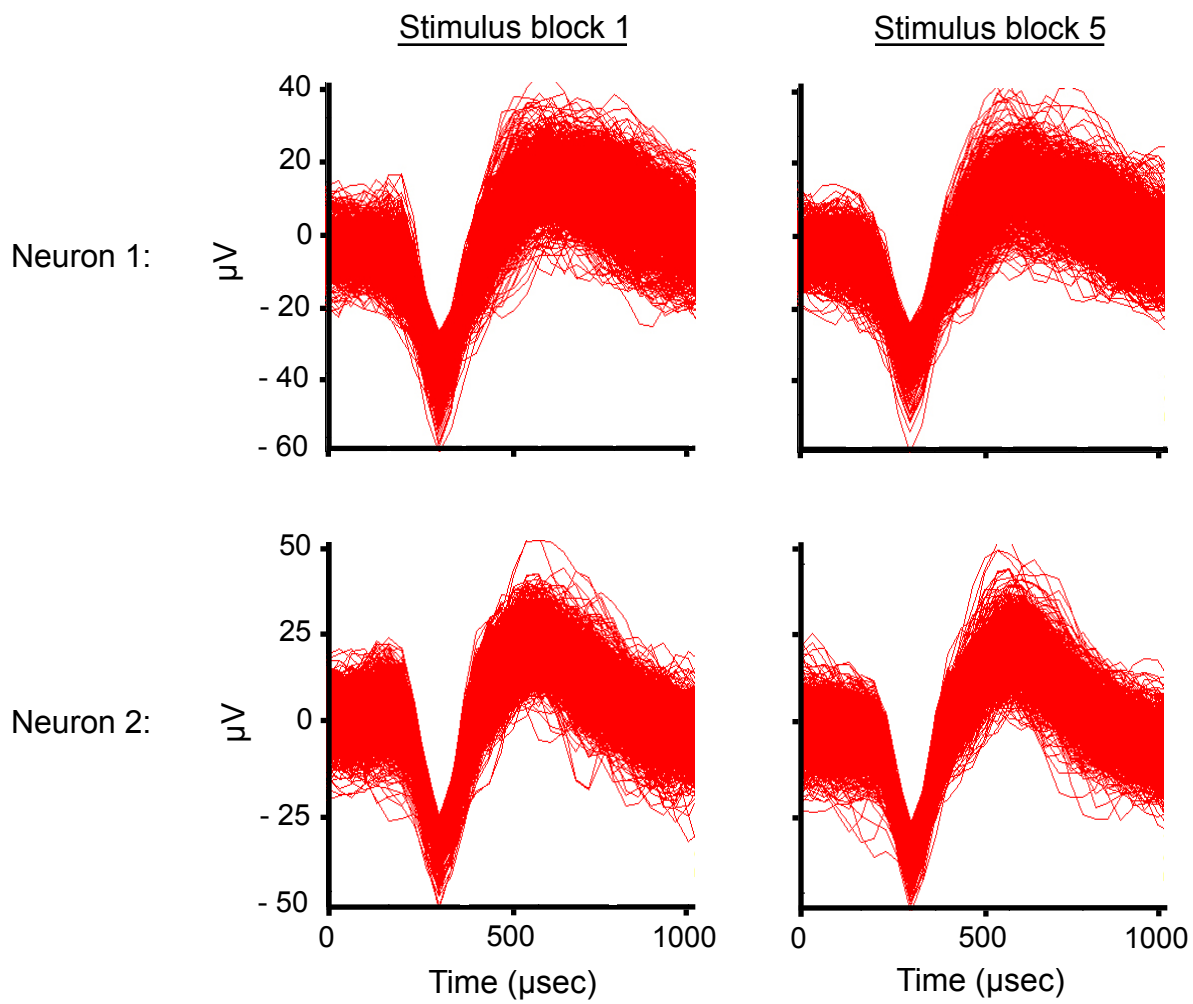

# Supplemental Figure 4

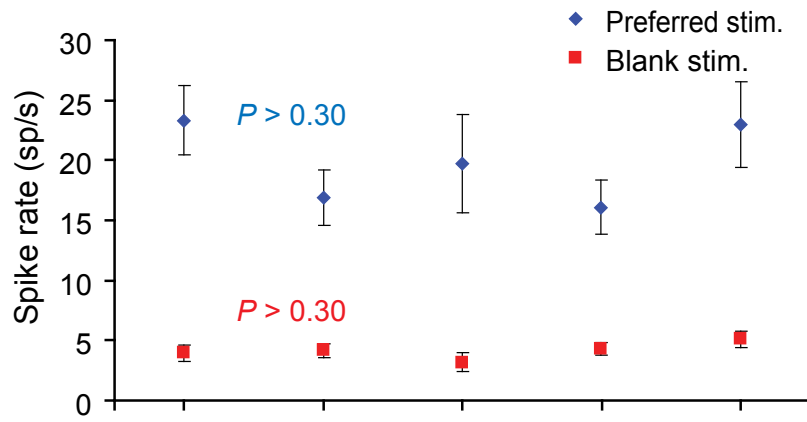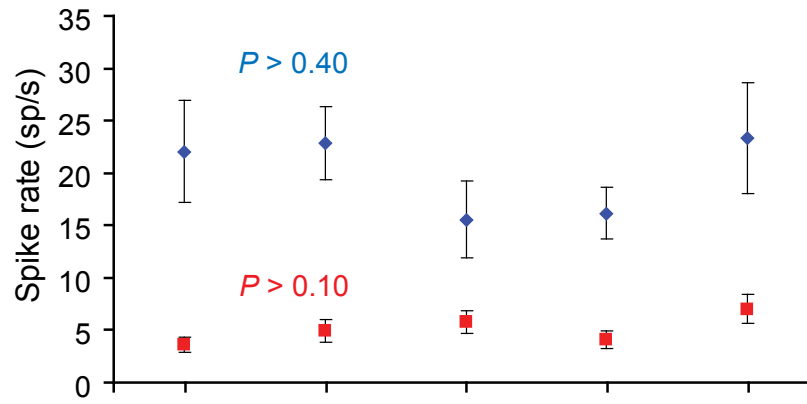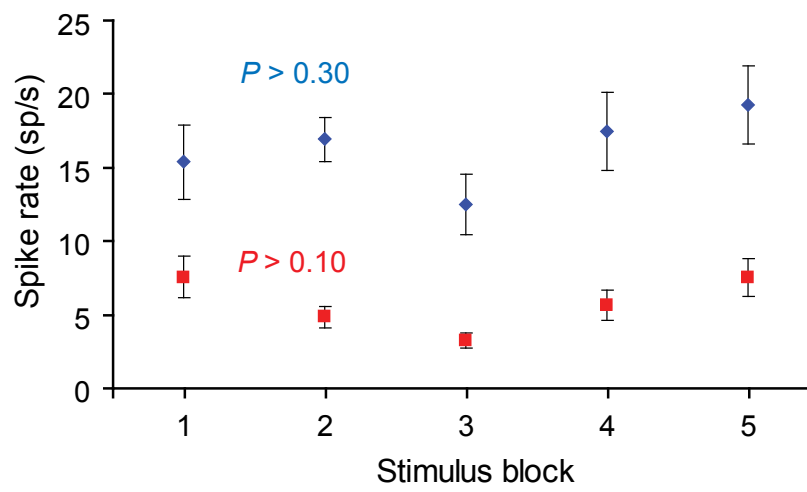

# Supplemental figure 5

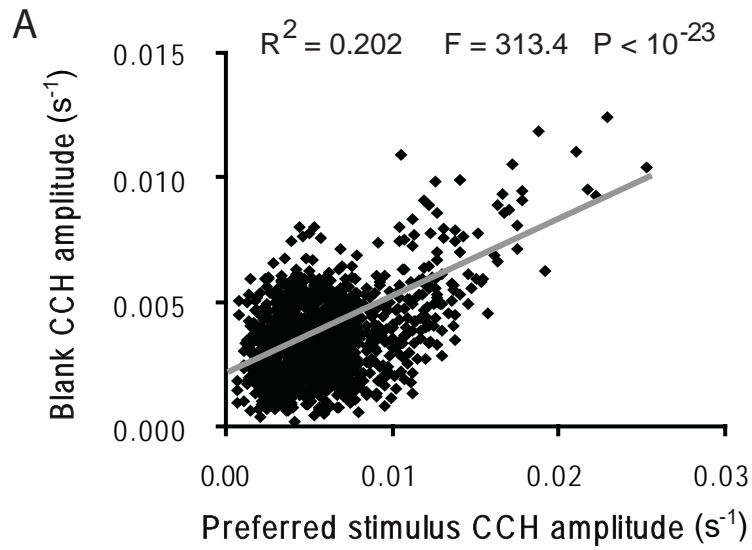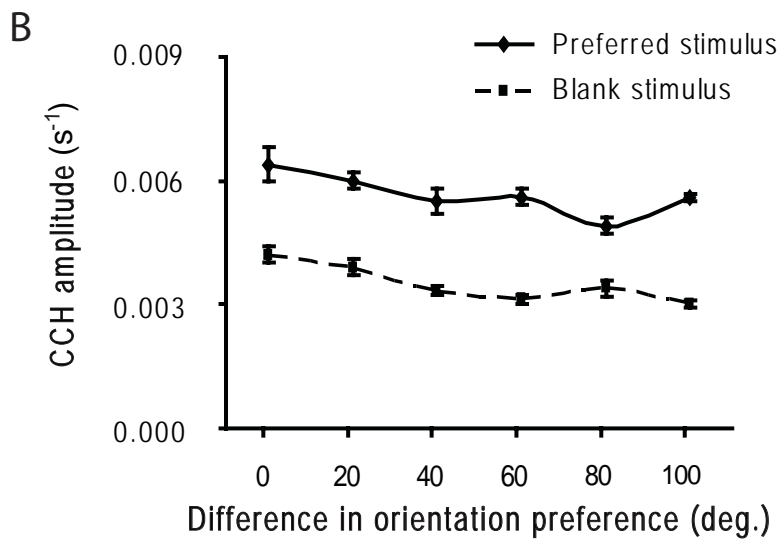

# Supplemental Figure 6

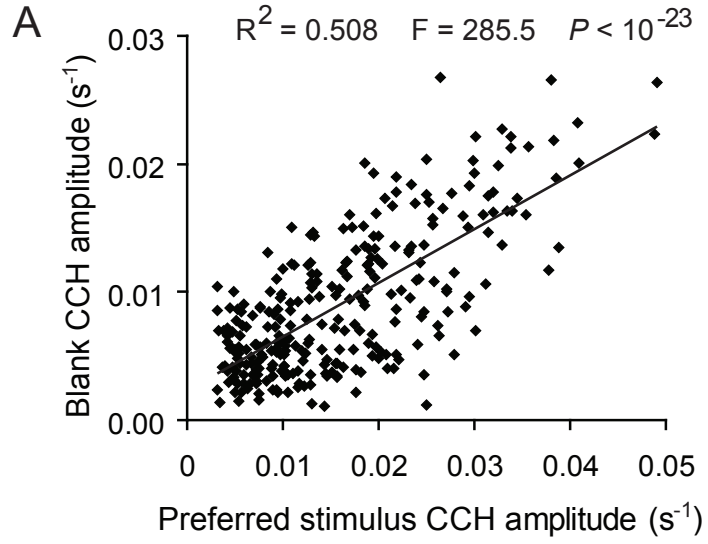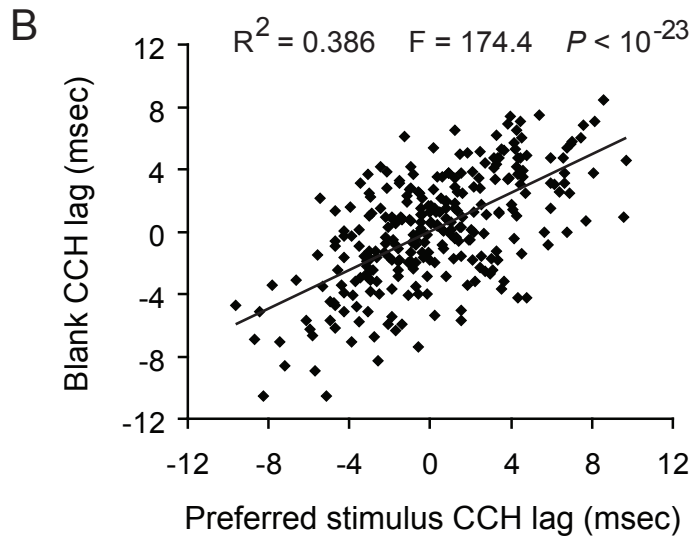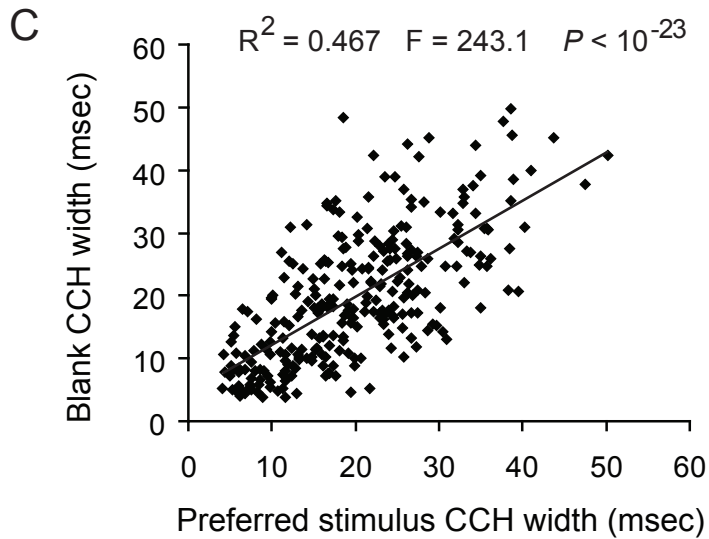

# Supplemental Figure 7

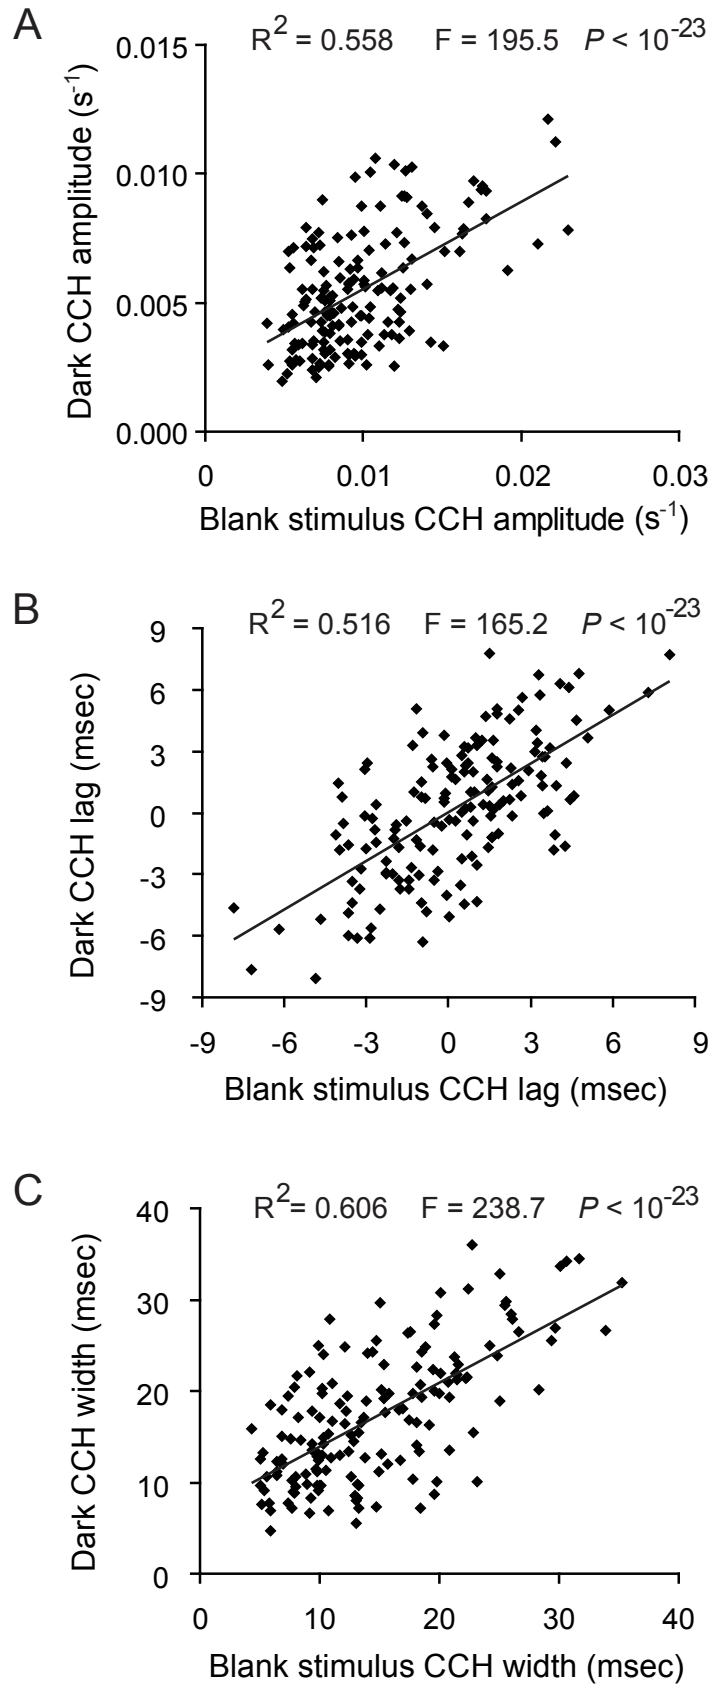

# Supplemental Figure 8

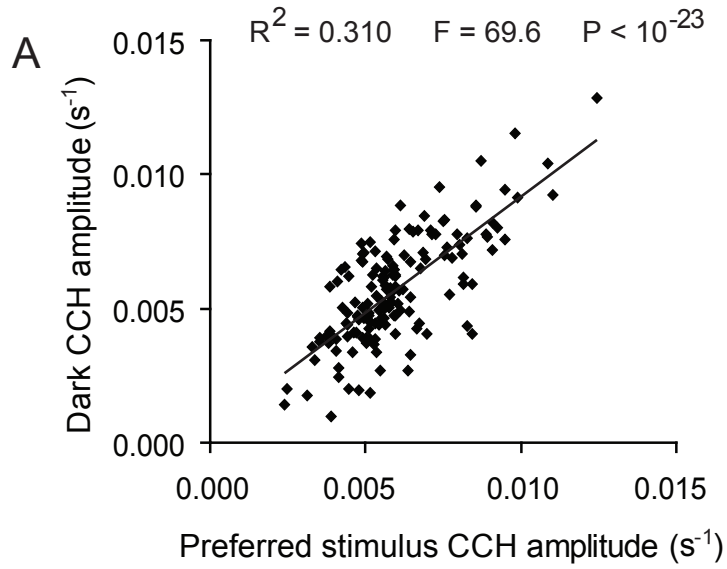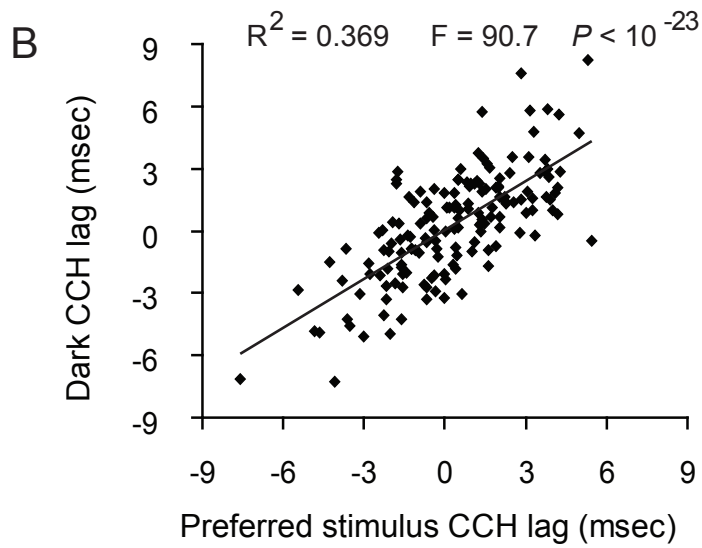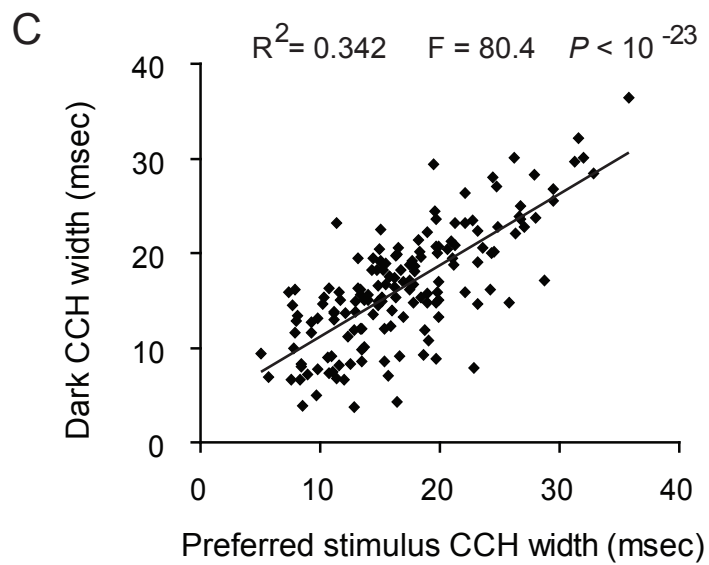

Supplement: supp_91207.2008_figsS1-S8.pdf [file supp_91207.2008_figsS1-S8.pdf]
